# Supplementary material for: Melanoma Brain Metastases Patient-Derived Organoids: an <em>in Vitro</em> Platform for Drug Screening
Source: Preprints.org preprint supplement (doi:10.20944/preprints202407.0598.v1), 2024-07-08
Supplement: Supplementary file 1 [file supplementary]

Suppl. Table 1: MBM-PDOs culture media

| **Reagent name** | **Company** | **Final concentration** |
| --- | --- | --- |
| L-WRN cells’ conditioned media | ATCC, Virginia, USA | 1:1 ratio |
| Advanced DMEM/F12 | Gibco, fisher scientific, Grand Island, USA | 1x |
| penicillin/streptomycin (100x) | Carl Roth, Karlsruhe, Germany | 2% |
| GlutaMax (100x) | Carl Roth, Karlsruhe, Germany | 2x |
| HEPES solution | Carl Roth, Karlsruhe, Germany | 20mM |
| B27 supplement (50x) without Vitamin A | Merck, Darmstadt, Germany | 2x |
| N2 supplement | Merck, Darmstadt, Germany | 2x |
| [Leu15]-Gastrin I human | Merck, Darmstadt, Germany | 20 nM |
| N-Acetyl-L-cysteine | Acros Organics, Geel, Belgium, Thermo Fisher Scientific | 2.5 mM |
| Nicotinamide | Sigma-Aldrich, St. Louis MI, USA | 20 mM |
| Recombinant human EGF | Peprotech, Rocky Hill, NJ, USA | 50 ng/ml |
| SB202190 | Peprotech, Rocky Hill, NJ, USA | 10 μM |
| A8301 | Sigma-Aldrich, St. Louis MI, USA | 0,5 µM |
| Y27632 dihydrochloride | Biogems, Westlake Village, CA, USA | 10 µM |
| Normocin | InvivoGen, San Diego CA, USA | 100 μg/mL |

Suppl. Table 2: Quantification of Ki67 staining

| **Case** | **% of Ki67 positive nuclei** | |
| --- | --- | --- |
| **Primary tumor tissue** | **Organoid tissue** |
| **SA1** | 70% | 60% |
| **SA3** | 50% | 50% |
| **SA12** | 40% | 90% |
| **SA17** | 10% | 10% |
| **SA20** | 5% | 5% |
| **SA34** | 50% | 45% |
| **SA41** | 60% | 50% |
